# Supplementary material for: Impact of fluorine substitution position on triarylamine-based hole transport materials in perovskite solar cells
Source: Royal Society of Chemistry journal article supplement (doi:10.1039/d5cp04078g), 2025-12-22
Supplement: d5cp04078g1.pdf [file d5cp04078g1.pdf]

## Electronic supplementary information (ESI)

# Impact of Fluorine Substitution Position on Triarylamine-Based Hole Transport Materials in Perovskite Solar Cells

Bhim Raju Telugu,<sup>\*a</sup> Hanbo Jung,<sup>ab</sup> Zhanglin Guo,<sup>abc</sup> Toshinori Matsushima<sup>\*abcd</sup>

*<sup>a)</sup> International Institute for Carbon-Neutral Energy Research (WPI-I2CNER), Kyushu University, Fukuoka 819-0395, Japan. E-mail: [tmatusim@i2cner.kyushu-u.ac.jp](mailto:tmatusim@i2cner.kyushu-u.ac.jp)*

*<sup>b)</sup> Center for Energy Systems Design (CESD), International Institute for Carbon-Neutral Energy Research (WPI-I2CNER), Kyushu University, Fukuoka 819-0395, Japan*

*<sup>c)</sup> Department of Automotive Science, Graduates School of Integrated Frontier Sciences, Kyushu University, 744 Motoooka, Nishi, Fukuoka 819-0395, Japan*

*<sup>d)</sup> Department of Applied Chemistry, Faculty of Engineering, Kyushu University, Fukuoka 819-0395, Japan.*

\*Corresponding authors: Telugu Bhim Raju, Toshinori Matsushima,

Email: [tmatusim@i2cner.kyushu-u.ac.jp](mailto:tmatusim@i2cner.kyushu-u.ac.jp)

Email: [bhimraju@i2cner.kyushu-u.ac.jp](mailto:bhimraju@i2cner.kyushu-u.ac.jp)

## 1. Experimental section

### 1.1. Materials and methods.

All solvents and reagents were purchased from Aldrich, TCI, or Wako and used as received with a stated purity above 98%. Thin-layer chromatography (TLC) was performed on Merck KGaA precoated silica gel 60F254 aluminum sheets. Column chromatography was carried out using glass columns packed with Silicycle Ultra Pure Silica Flash P60 silica gel (40–63  $\mu\text{m}$ , 230–400 mesh). Unless otherwise noted, all reactions and manipulations were conducted under a nitrogen atmosphere. Reagent-grade solvents were used for synthesis, whereas spectroscopy-grade solvents were employed for spectroscopic measurements. All solvents were dried using standard procedures prior to use.

### 1.2. Characterizations

$^1\text{H}$  and  $^{13}\text{C}$  NMR spectra were recorded on a Bruker AVANCE III 600 MHz spectrometer in deuterated chloroform ( $\text{CDCl}_3$ ), using tetramethylsilane (TMS) as the internal standard. Chemical shifts were referenced to the residual solvent peaks ( $\delta = 7.26$  ppm for  $^1\text{H}$  and  $\delta = 77.23$  ppm for  $^{13}\text{C}$ ). All spectra were obtained at room temperature, with chemical shifts reported in ppm and coupling constants in Hz. Mass spectrometric analysis was conducted using an ultra-performance liquid chromatography time-of-flight mass spectrometer (UPLC-TOF-MS, Agilent 1290–6545). The corresponding NMR and mass spectra are presented in Figures S2–S25. UV–Vis–NIR absorption spectra were measured for both solution-state (chloroform) and thin-film samples (on quartz substrates) using a Jasco V-730 spectrophotometer. Fluorescence spectra of the same samples were recorded using a Jasco FP-8300 fluorescence spectrophotometer. Cyclic voltammetry (CV) measurements were performed using a CHI 660A electrochemical workstation equipped with platinum electrodes and an Ag/AgCl reference electrode, operated at a scan rate of  $50\text{ mV s}^{-1}$ . All CV experiments were carried out in a nitrogen-saturated solution of 0.1 M tetrabutylammonium hexafluorophosphate ( $\text{Bu}_4\text{NPF}_6$ ) in dichloromethane (DCM;  $\text{CH}_2\text{Cl}_2$ ). The ground-state geometries and vertical excitation energies of the synthesized HTM molecules were investigated computationally using density functional theory (DFT) and time-dependent DFT (TD-DFT) calculations, employing the B3LYP functional with the 6-31G(d,p) basis set. All calculations were performed in the gas phase (no solvent model applied) using the Gaussian 16 software package. Scanning electron microscopy (SEM) top-view images of the perovskite films were obtained using a field-emission SEM system (JSM-7900F, JEOL) operated at an acceleration voltage of 5 kV with a magnification of  $\times 10,000$ . Thermal gravimetry-differential

thermal analysis (TG-DTA; 2400SA, Bruker) was carried out, with a heating rate of 10°C min<sup>-1</sup> under a nitrogen atmosphere.

### 1.3 Synthetic procedure

The synthetic routes of the HTMs are illustrated in Figure S1, with detailed procedures provided. All intermediates, including 4-bromo-3-fluoro-*N,N*-bis(4-methoxyphenyl)aniline, 4-bromo-2-fluoro-*N,N*-bis(4-methoxyphenyl)aniline, and *N*-(2-fluorophenyl)-*N*-(4-methoxyphenyl)-9,9-dimethyl-9H-fluoren-2-amine, were synthesized via the Buchwald–Hartwig amination method.<sup>S1,S2</sup> The target HTMs were subsequently prepared through palladium-catalyzed Suzuki–Miyaura coupling reactions using tetrakis(triphenylphosphine)palladium(0) (Pd(PPh<sub>3</sub>)<sub>4</sub>) as the catalyst.<sup>S3,S4</sup>

### 3.1 synthesis scheme:

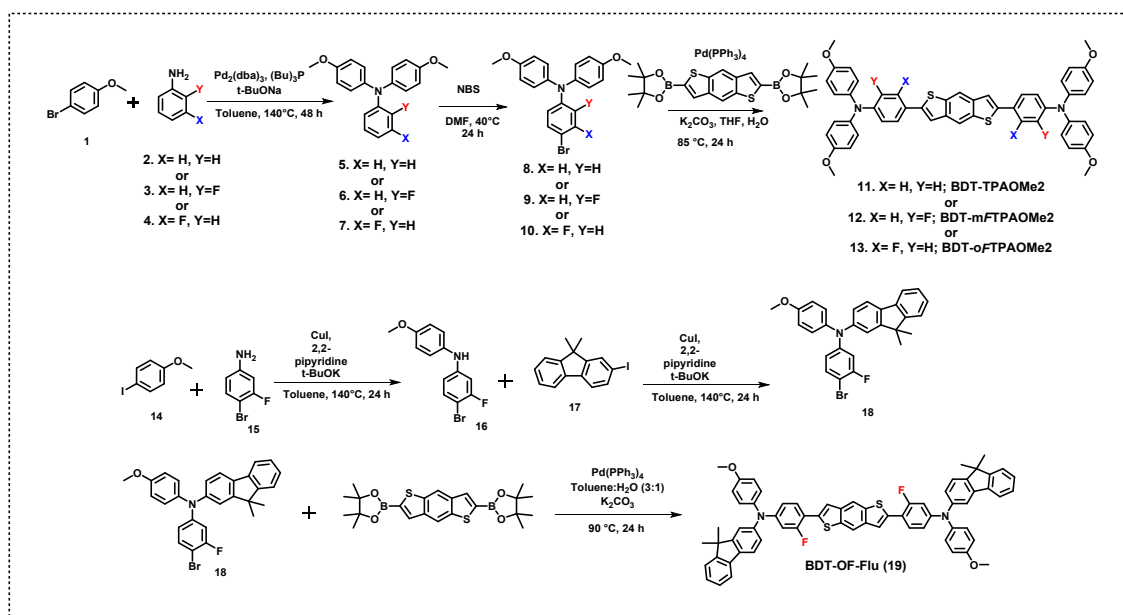

**Fig. S1.** Synthetic route for HTMs.

### General synthesis procedure for compounds 6 and 7

A solution of aniline (9.85 mmol), 4-bromothioanisole (29.54 mmol), t-BuONa (39.39 mmol), and P(t-Bu)<sub>3</sub> (2.00 mmol) in dry toluene (50 mL) was degassed with nitrogen for 30 min. Pd(OAc)<sub>2</sub> (220 mg, 0.98 mmol) was then added under a nitrogen atmosphere, and the resulting mixture was refluxed for 48 h. After cooling to room temperature, the crude product was extracted

with chloroform and washed with water. Compounds 6 and 7 were obtained as a brown solid after purification by column chromatography (hexane/chloroform, 2:1, v/v).

***2-fluoro-N,N-bis(4-methoxyphenyl)aniline (6)***

<sup>1</sup>H NMR (600 MHz, CDCl<sub>3</sub>) δ 7.48 (s, 4H), 7.29 (d, J = 11.7 Hz, 10H), 7.16 (d, J = 8.5 Hz, 15H), 7.02 (d, J = 8.4 Hz, 15H), 4.01 (s, 22H); <sup>13</sup>C NMR (126 MHz, CDCl<sub>3</sub>) δ 158.63, 156.64, 155.34, 141.49, 135.71, 127.92, 124.74, 124.05, 117.05, 114.60, 77.41, 77.16, 76.91, 55.64. Yield- 72%.

***Compound 7***

<sup>1</sup>H NMR (600 MHz, CDCl<sub>3</sub>) δ 7.29 (d, J = 8.7 Hz, 4H), 7.06 (d, J = 8.7 Hz, 4H), 6.87 (d, J = 8.2 Hz, 1H), 6.81 (d, J = 11.8 Hz, 1H), 6.71 (t, J = 7.8 Hz, 1H), 3.99 (s, 6H); <sup>13</sup>C NMR (151 MHz, CDCl<sub>3</sub>) δ 164.37, 162.76, 156.38, 150.68, 148.62, 140.26, 129.90, 127.17, 125.41, 115.31 – 114.76, 113.84, 106.62 – 106.24, 106.23, 77.37, 77.16, 76.95, 55.43. Yield- 69%.

***General synthesis procedure for compounds 9 and 10***

To a solution of compound 9 or 10 (2.73 mmol) in DMF (30 mL), NBS (3.00 mmol) was added at 0 °C. The reaction mixture was then warmed to room temperature and stirred at 40 °C for 12 h in the dark. The reaction was quenched with water and extracted with chloroform. The organic layer was dried, and the solvent was removed under reduced pressure. The crude product was purified by column chromatography (hexane/chloroform, 2:1, v/v) to afford compound 9 or 10 as a pale green viscous oil.

***4-bromo-2-fluoro-N,N-bis(4-methoxyphenyl)aniline (9)***

<sup>1</sup>H NMR (600 MHz, CDCl<sub>3</sub>) δ 7.21 (d, J = 10.6 Hz, 1H), 7.14 (d, J = 8.8 Hz, 1H), 6.92 (d, J = 8.4 Hz, 4H), 6.79 (d, J = 8.4 Hz, 4H), 3.78 (s, 6H); <sup>13</sup>C NMR (126 MHz, CDCl<sub>3</sub>) δ 155.68, 141.00, 128.42, 128.03, 124.31, 120.68, 115.70, 114.72, 55.65. Yield- 90%.

***4-bromo-3-fluoro-N,N-bis(4-methoxyphenyl)aniline (10)***

<sup>1</sup>H NMR (600 MHz, CDCl<sub>3</sub>) δ 7.26 – 7.20 (m, 4H), 7.10 (d, J = 8.6 Hz, 12H), 6.88 (d, J = 8.7 Hz, 12H), 6.67 (d, J = 11.2 Hz, 3H), 6.58 (d, J = 8.7 Hz, 3H), 3.81 (s, 18H); <sup>13</sup>C NMR (151 MHz, CDCl<sub>3</sub>) δ 156.66, 149.94, 139.68, 132.99, 127.25, 115.88, 114.98, 107.04, 106.87, 97.62, 97.48, 55.48. Yield- 85%.

***General synthesis procedure for compounds 11, 12 and 13***

2,6-Bis(4,4,5,5-tetramethyl-1,3,2-dioxaborolan-2-yl)benzo[1,2-*b*:4,5-*b'*]dithiophene (0.50 mmol) and compound 8–10 (656 mg, 1.42 mmol) were dissolved in tetrahydrofuran (15 mL, degassed with nitrogen), followed by the addition of Pd(PPh<sub>3</sub>)<sub>4</sub> (0.06 mmol) and an aqueous K<sub>2</sub>CO<sub>3</sub> solution (5 mL, 2.0 M, degassed with nitrogen). The mixture was refluxed for 24 h. After cooling to room temperature, the reaction mixture was extracted with dichloromethane and washed with water. The organic phase was dried, concentrated under reduced pressure, and the residue was purified by column chromatography (hexane/chloroform, 2:8, v/v) to afford compound 11, 12, or 13 as a yellow solid.

***4,4'-(benzo[1,2-*b*:4,5-*b'*]dithiophene-2,6-diyl)bis(*N,N*-bis(4-methoxyphenyl)aniline) (11)***

<sup>1</sup>H NMR (600 MHz, CDCl<sub>3</sub>) δ 8.07 (s, 1H), 7.51 (d, *J* = 8.7 Hz, 2H), 7.39 (s, 1H), 7.15 – 7.05 (m, 4H), 6.95 (d, *J* = 8.7 Hz, 2H), 6.90 – 6.80 (m, 4H), 3.81 (s, 6H); <sup>13</sup>C NMR (151 MHz, CDCl<sub>3</sub>) δ 156.25, 149.00, 144.40, 140.54, 138.60, 136.78, 127.12, 126.98, 126.19, 120.19, 116.78, 116.00, 114.88, 55.62. Yield- 67%.

***4,4'-(benzo[1,2-*b*:4,5-*b'*]dithiophene-2,6-diyl)bis(2-fluoro-*N,N*-bis(4-methoxyphenyl)aniline) (12)***

<sup>1</sup>H NMR (600 MHz, CDCl<sub>3</sub>) δ 8.13 (s, 1H), 7.46 (s, 1H), 7.39 (dd, *J* = 23.6, 10.0 Hz, 2H), 7.07 (t, *J* = 7.8 Hz, 1H), 6.99 (d, *J* = 8.2 Hz, 4H), 6.83 (d, *J* = 8.2 Hz, 4H), 3.80 (s, 6H); <sup>13</sup>C NMR (151 MHz, CDCl<sub>3</sub>) δ 157.70 (s), 156.04, 155.68, 143.18, 141.00, 138.64, 137.11, 135.86, 130.20, 127.14, 124.52, 122.74, 118.39, 116.56, 114.89, 114.65, 60.55, 55.62. Yield- 70%.

***4,4'-(benzo[1,2-*b*:4,5-*b'*]dithiophene-2,6-diyl)bis(3-fluoro-*N,N*-bis(4-methoxyphenyl)aniline) (13)***

<sup>1</sup>H NMR (600 MHz, CDCl<sub>3</sub>) δ 8.12 (s, 1H), 7.58 (s, 1H), 7.44 (t, *J* = 8.7 Hz, 1H), 7.12 (d, *J* = 8.7 Hz, 4H), 6.88 (d, *J* = 8.7 Hz, 4H), 6.66 (dd, *J* = 20.0, 11.6 Hz, 2H), 3.82 (s, 6H); <sup>13</sup>C NMR (151 MHz, CDCl<sub>3</sub>) δ 161.25, 159.59, 156.82, 150.21, 139.65, 138.59, 138.22, 136.40, 129.51, 127.57, 120.36, 115.97, 115.03, 114.70, 113.38, 106.20, 106.02, 55.63. Yield- 73%.

***Synthesis of 4-bromo-3-fluoro-*N*-(4-methoxyphenyl)aniline (16)***

4-Bromo-3-fluoroaniline (2.00 g, 10.52 mmol), 4-iodoanisole (2.55 g, 10.52 mmol), CuI (0.20 g, 1.05 mmol), 2,2'-bipyridine (0.16 g, 1.05 mmol), and *t*-BuOK (1.50 g, 15.78 mmol) were added to dry toluene (100 mL) under a nitrogen atmosphere. The resulting mixture was refluxed for 48

h. After cooling to room temperature, the crude product was filtered and concentrated under reduced pressure. Compound 16 was obtained as a pale-yellow liquid after purification by column chromatography (hexane/chloroform, 1:2, v/v).

<sup>1</sup>H NMR (600 MHz, CDCl<sub>3</sub>) δ 7.28 (dd, J = 8.6, 8.0 Hz, 1H), 7.09 – 7.05 (m, 2H), 6.91 – 6.87 (m, 2H), 6.63 (dd, J = 11.0, 2.6 Hz, 1H), 6.53 – 6.49 (m, 1H), 5.57 (s, 1H), 3.81 (s, 3H). <sup>13</sup>C NMR (151 MHz, CDCl<sub>3</sub>) δ 160.65, 159.03, 156.43, 146.96, 134.00, 133.58, 127.25, 123.95, 114.93, 112.01, 102.70, 102.53, 96.67, 96.53, 55.67. Yield- 65%, 2.0 gms.

***Synthesis of N-(4-bromo-3-fluorophenyl)-N-(4-methoxyphenyl)-9,9-dimethyl-9H-fluoren-2-amine (18)***

Compound 16 (3.00 g, 10.13 mmol), 2-iodo-9,9-dimethyl-9H-fluorene (3.24 g, 10.13 mmol), CuI (0.96 g, 5.06 mmol), 2,2'-bipyridine (0.78 g, 5.06 mmol), and t-BuOK (2.90 g, 30.39 mmol) were added to dry toluene (100 mL) under a nitrogen atmosphere. The reaction mixture was refluxed for 48 h. After cooling to room temperature, the crude product was filtered and concentrated under reduced pressure. Compound 18 was obtained as a pale-yellow solid after purification by column chromatography (hexane/chloroform, 1:2, v/v).

<sup>1</sup>H NMR (600 MHz, CDCl<sub>3</sub>) δ 7.66-7.65 (d, 1H), 7.61-7.58 (t, 1H), 7.41-7.40 (d, 1H), 7.34 – 7.25 (m, 3H), 7.19-7.17 (m, 1H), 7.16-7.12 (m, 2H), 7.04-7.03 (d, 1H), 6.90-6.88 (m, 2H), 6.81-6.61 (m, 2H), 3.83 (s, 3H), 1.43 (s, 6H). <sup>13</sup>C NMR (151 MHz, CDCl<sub>3</sub>) δ 160.33, 158.70, 156.93, 156.67, 155.34, 155.20, 153.64, 150.33, 150.27, 149.63, 149.57, 146.95, 146.41, 139.80, 129.16, 128.36, 127.70, 127.69, 127.15, 122.63, 122.60, 120.88, 119.67, 118.77, 115.12, 115.0, 99.10, 55.60, 47.2, 27.19. Yield- 70%, 3.46 gms.

***Synthesis of N-(4-(6-(4-((9,9-dimethyl-9H-fluoren-3-yl)(4-methoxyphenyl)amino)-3-fluorophenyl)benzo[1,2-b:4,5-b']dithiophen-2-yl)-2-fluorophenyl)-N-(4-methoxyphenyl)-9,9-dimethyl-9H-fluoren-2-amine (19)***

2,6-Bis(4,4,5,5-tetramethyl-1,3,2-dioxaborolan-2-yl)benzo[1,2-b:4,5-b']dithiophene (0.50 g, 1.13 mmol) and compound 18 (1.10 g, 2.26 mmol) were dissolved in tetrahydrofuran (15 mL, degassed with nitrogen), followed by the addition of Pd(PPh<sub>3</sub>)<sub>4</sub> (0.063 g, 0.056 mmol) and an aqueous K<sub>2</sub>CO<sub>3</sub> solution (5 mL, 2.0 M, degassed with nitrogen). The mixture was refluxed for 24 h. After cooling to room temperature, the reaction mixture was extracted with dichloromethane and washed with water. The organic phase was dried, concentrated under reduced pressure, and

the residue was purified by column chromatography (hexane/chloroform, 2:8, v/v) to afford compound 19 as an orange solid. Yield- 65%, 0.73 gms.

$^1\text{H}$  NMR (600 MHz,  $\text{CDCl}_3$ )  $\delta$  8.14 (s, 1H), 7.66-7.61 (m, 3H), 7.50 (m, 1H), 7.41-7.40 (m, 1H), 7.33-7.24 (m, 3H), 7.18-7.16 (m, 2H), 7.09-7.08 (m, 1H), 6.91-6.79 (m, 3H), 3.84 (s, 3H), 1.44 (s, 6H).  $^{13}\text{C}$  NMR (151 MHz,  $\text{CDCl}_3$ )  $\delta$  159.57, 157.04, 155.35, 153.71, 149.81, 146.24, 139.67, 138.85, 138.62, 136.47, 135.18, 129.59, 127.94, 127.16, 126.87, 123.85, 122.65, 120.90, 119.72, 119.14, 116.41, 116.09, 115.14, 55.64, 47.02, 27.22.

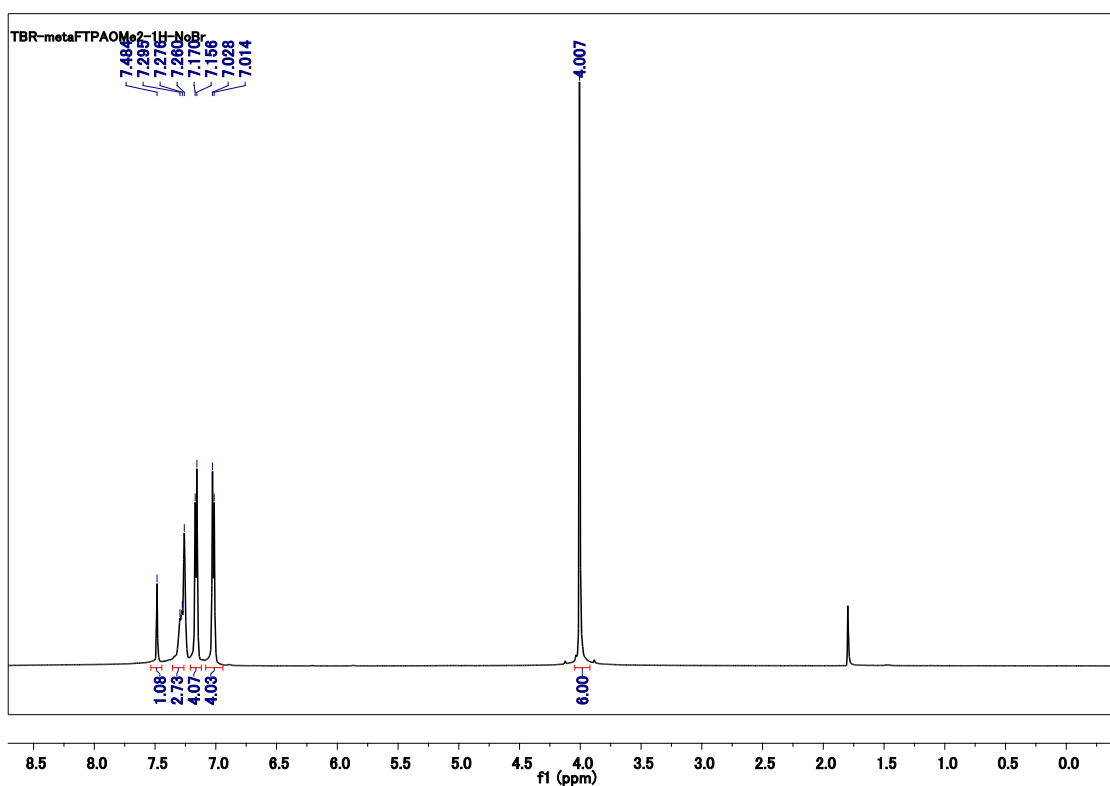

**Fig. S2.**  $^1\text{H}$  NMR spectrum of compound 6 in deuterated chloroform.

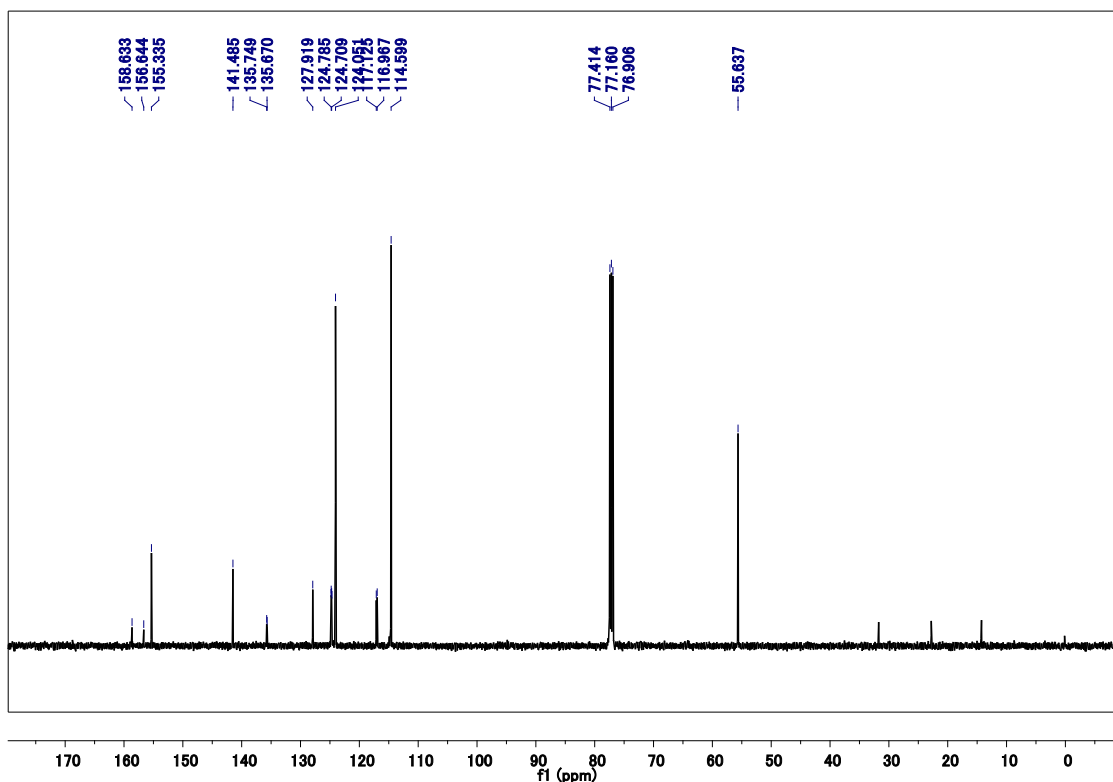

**Fig. S3.** <sup>13</sup>C NMR spectrum of compound 6 in deuterated chloroform.

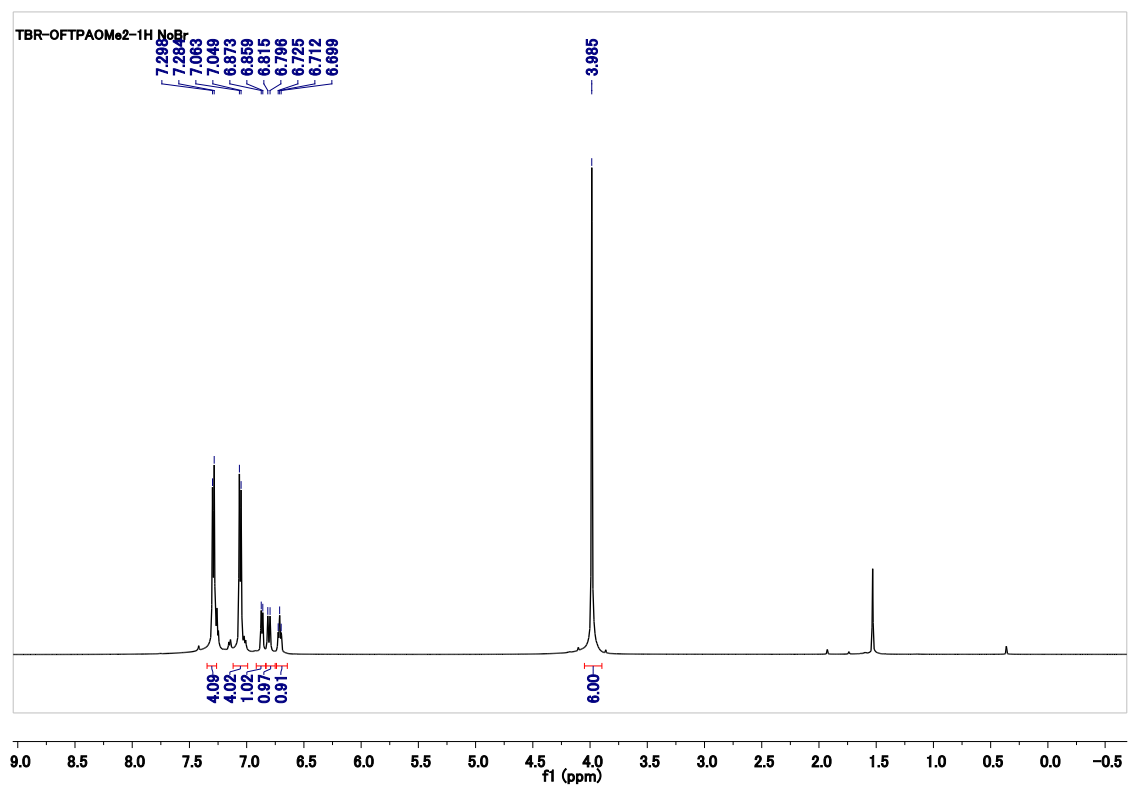

**Fig. S4.** <sup>1</sup>H NMR spectrum of compound 7 in deuterated chloroform.



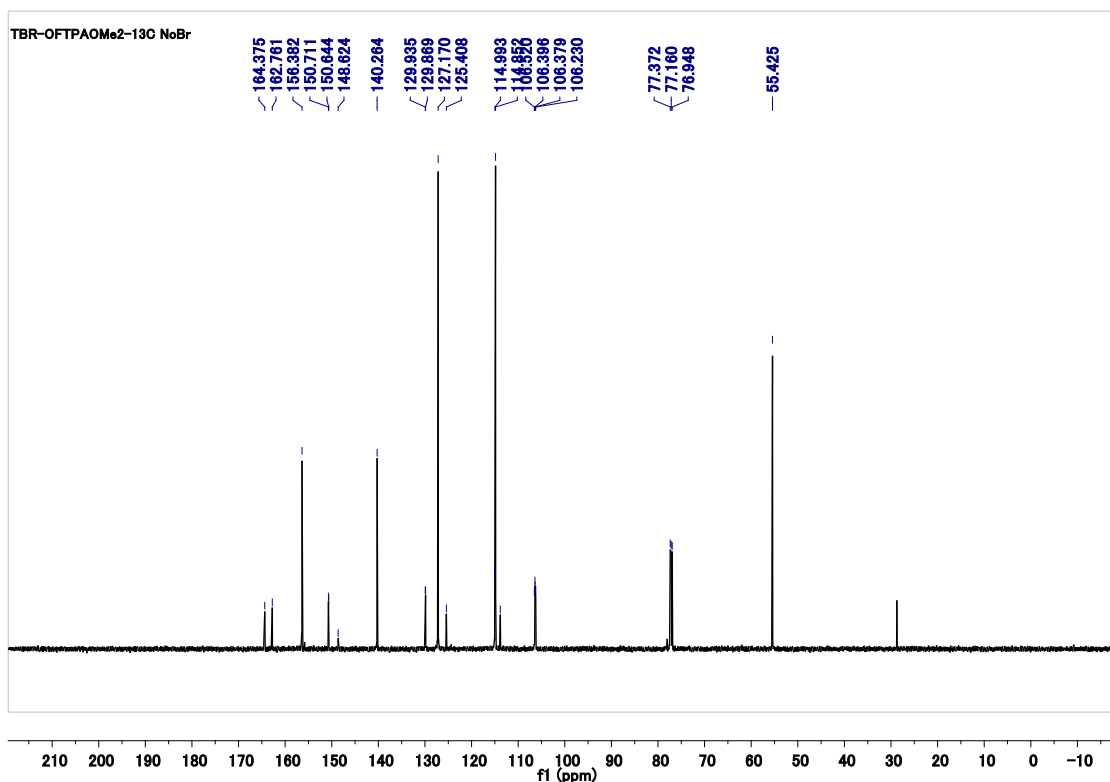

Fig. S5.  $^{13}\text{C}$  NMR spectrum of compound 7 in deuterated chloroform.

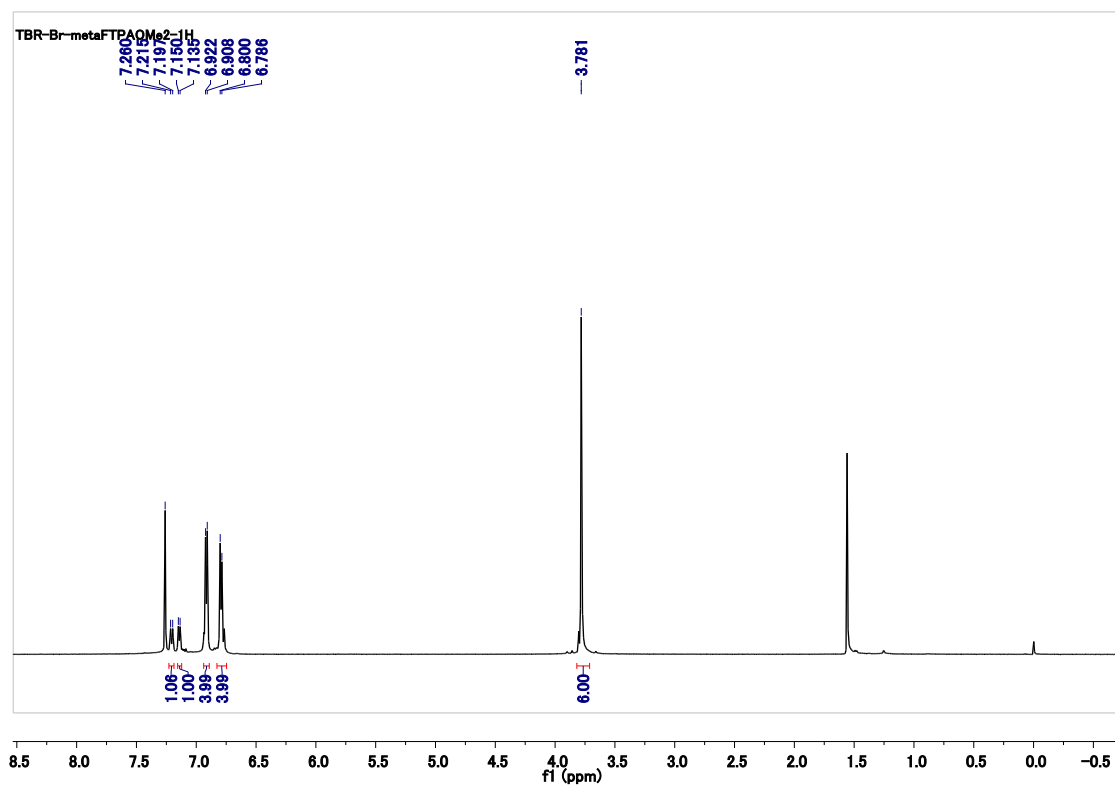

Fig. S6.  $^1\text{H}$  NMR spectrum of compound 9 in deuterated chloroform.

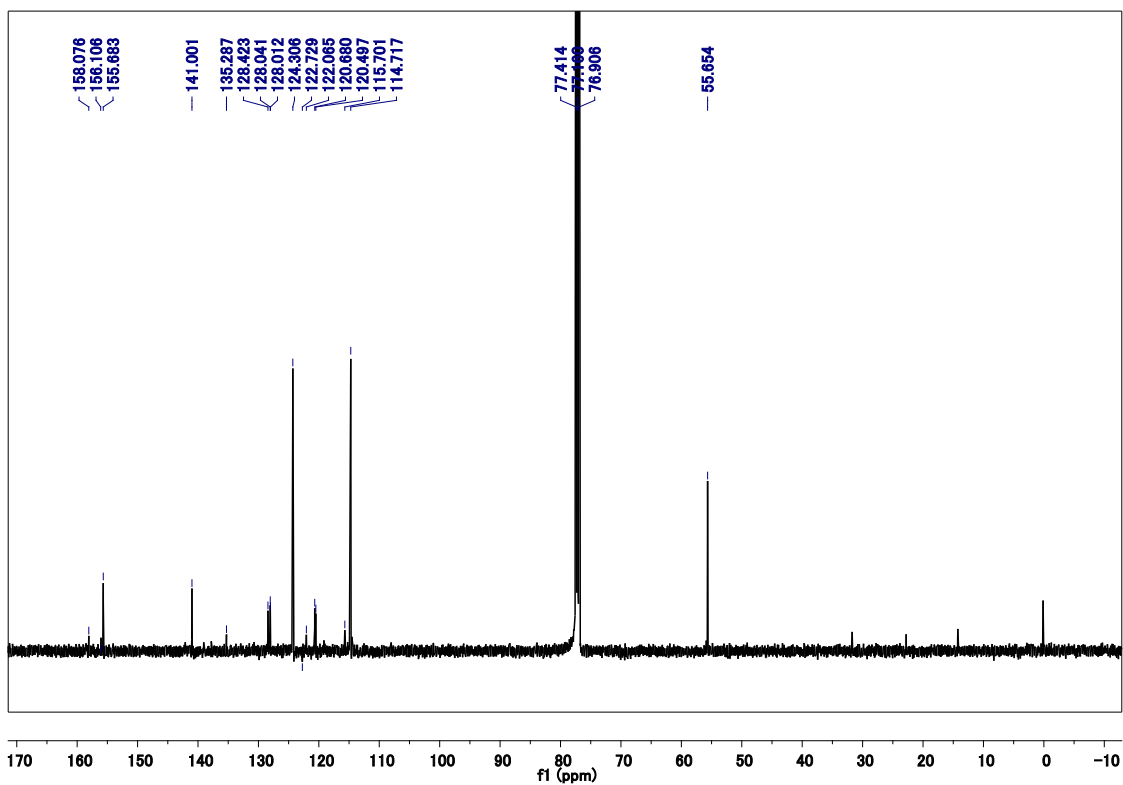

Fig. S7. <sup>13</sup>C NMR spectrum of compound 9 in deuterated chloroform.

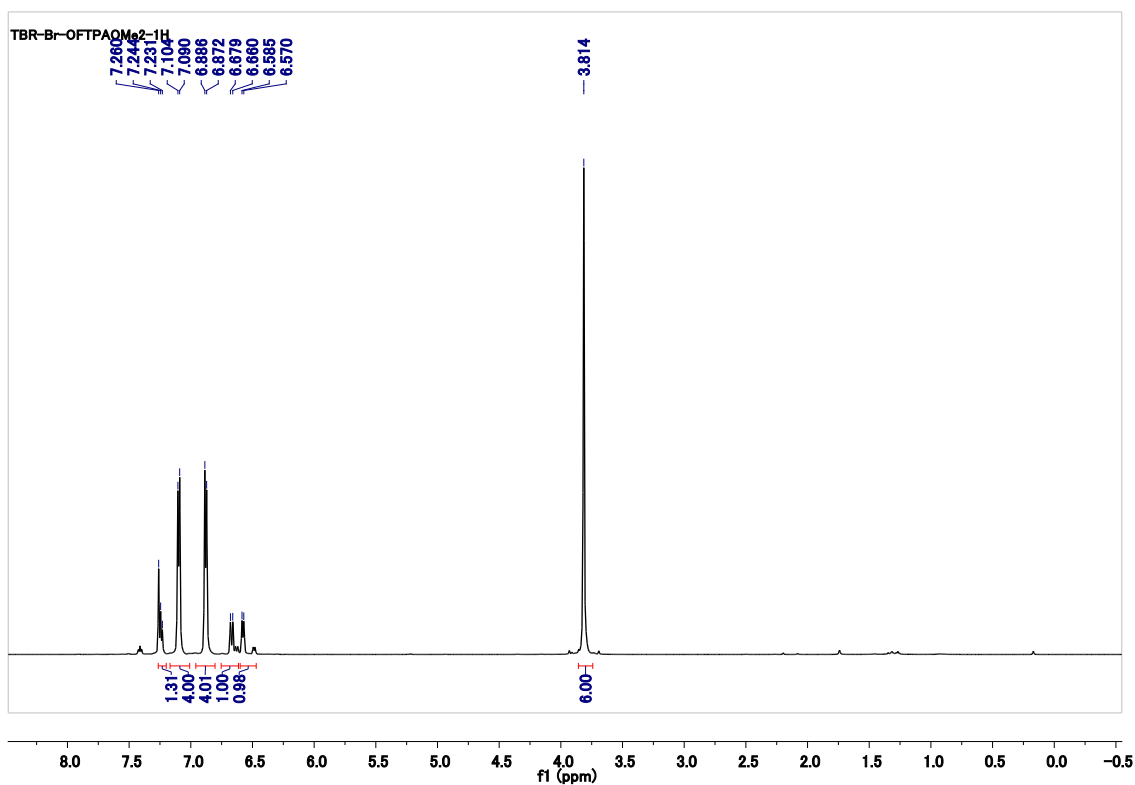

Fig. S8. <sup>1</sup>H NMR spectrum of compound 10 in deuterated chloroform.

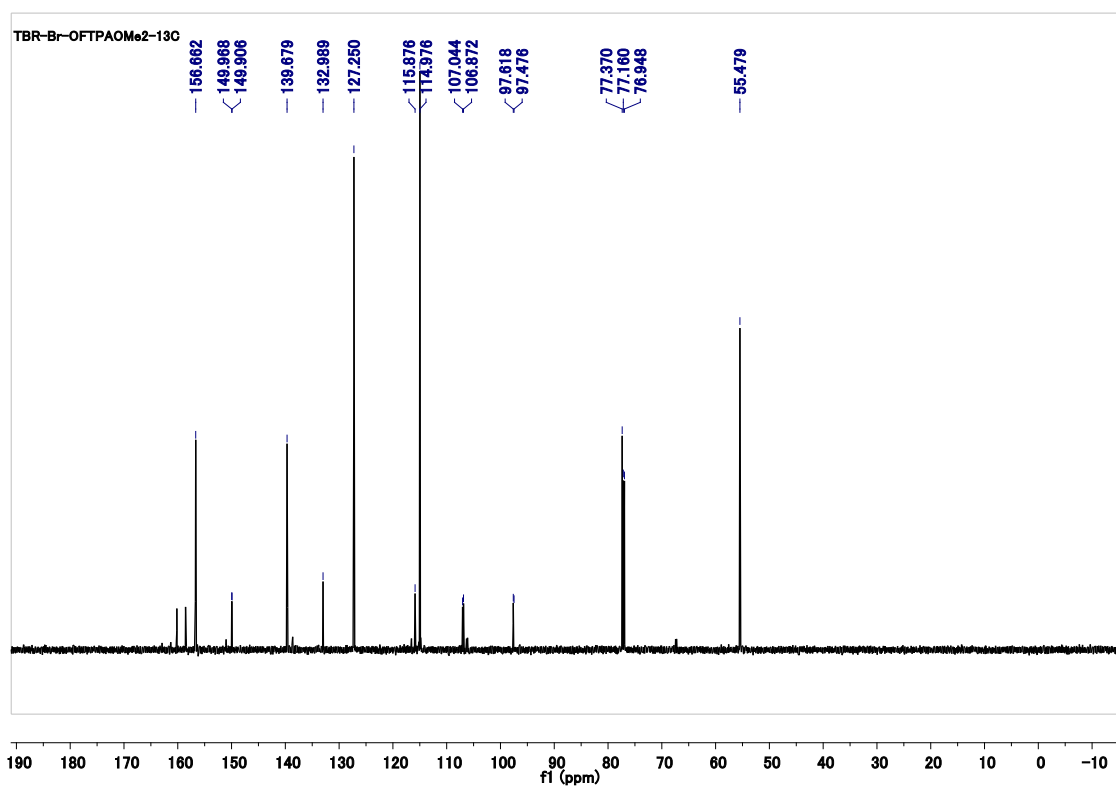

**Fig. S9.**  $^{13}\text{C}$  NMR spectrum of compound 10 in deuterated chloroform.

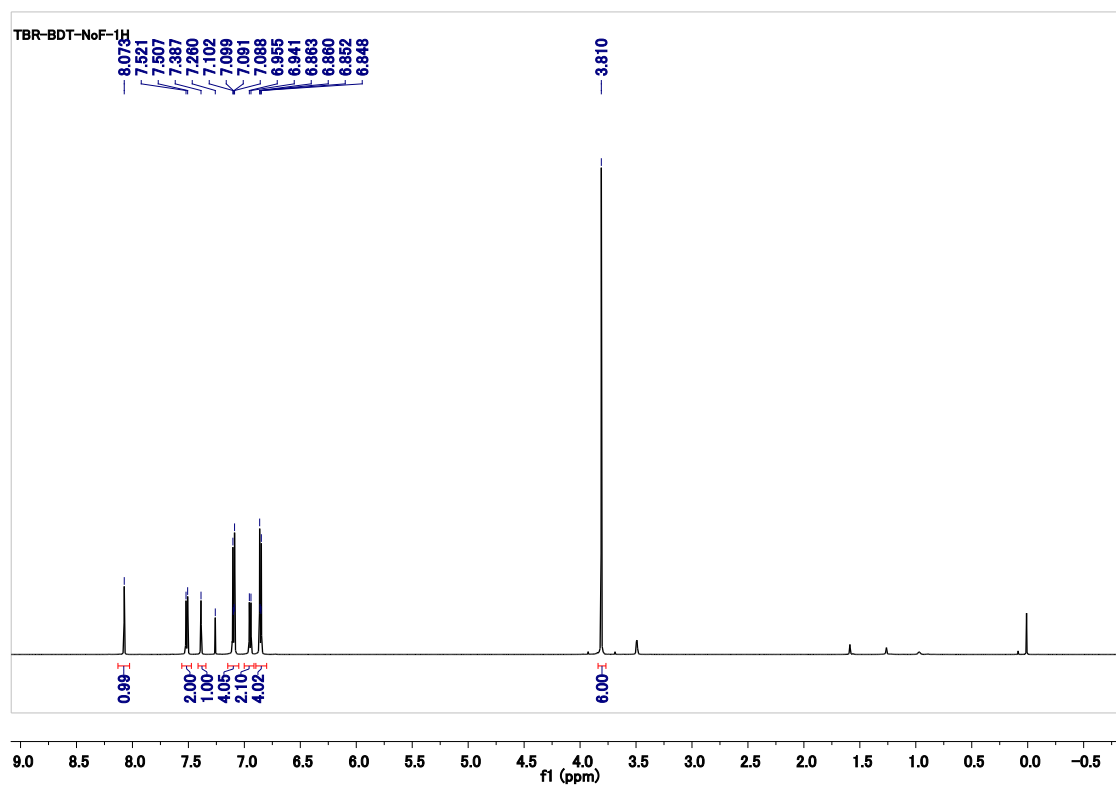

**Fig. S10.**  $^1\text{H}$  NMR spectrum of compound 11 in deuterated chloroform.

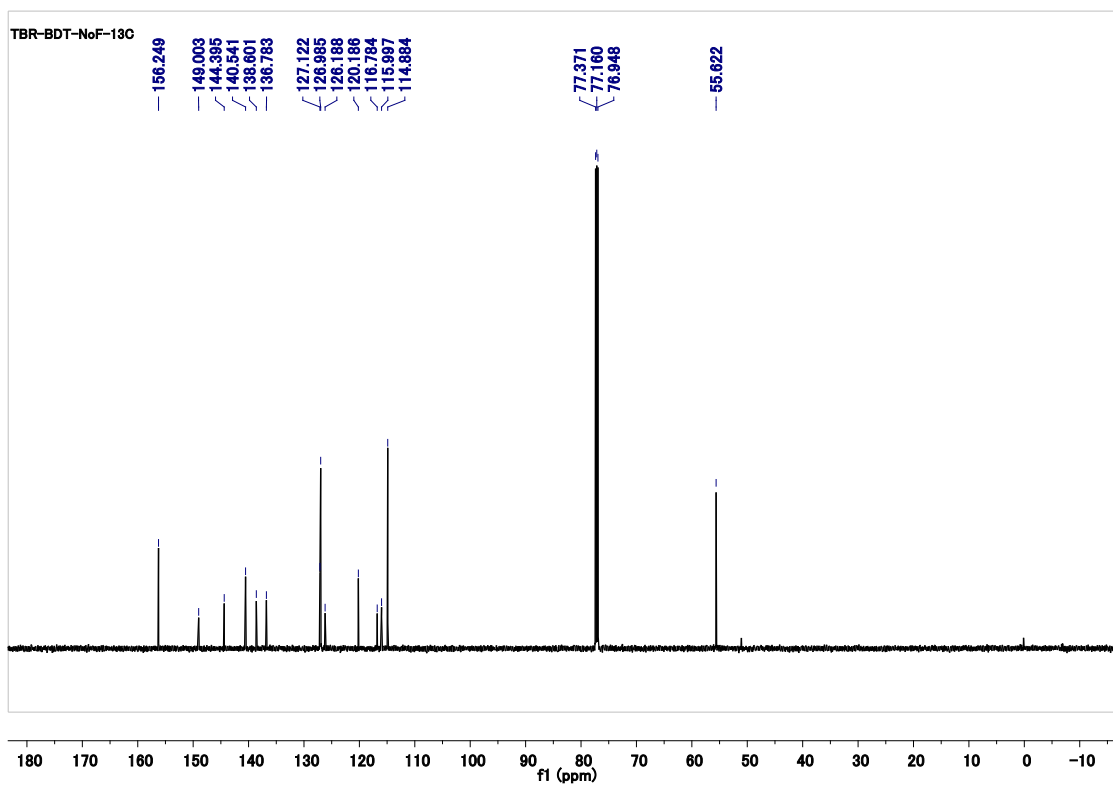

**Fig. S11.**  $^{13}\text{C}$  NMR spectrum of compound 11 in deuterated chloroform.

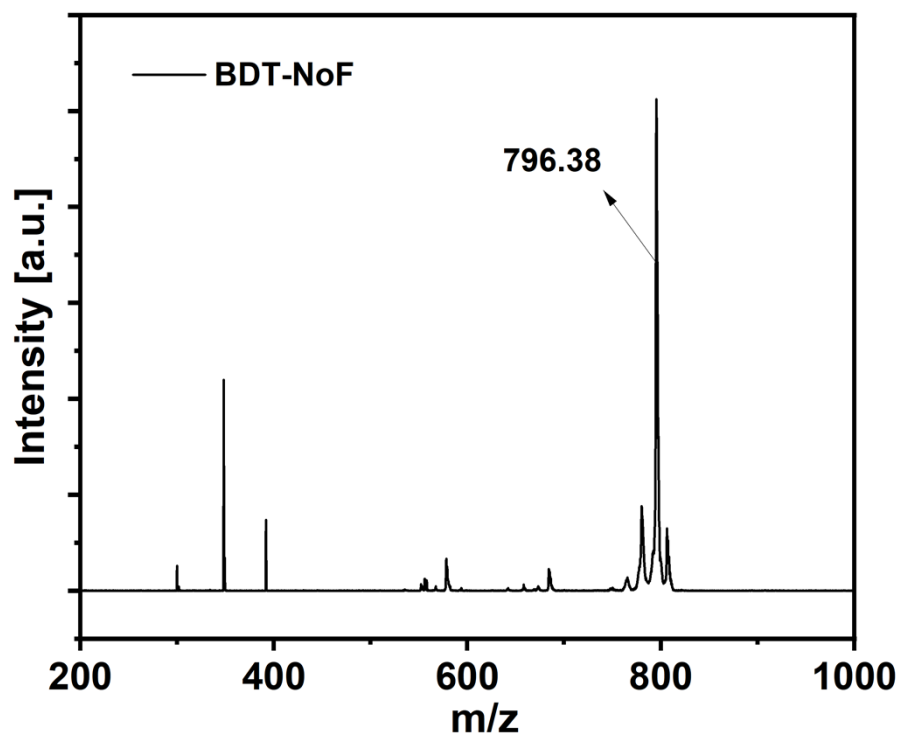

**Fig. S12.** Mass spectrum of compound 11.

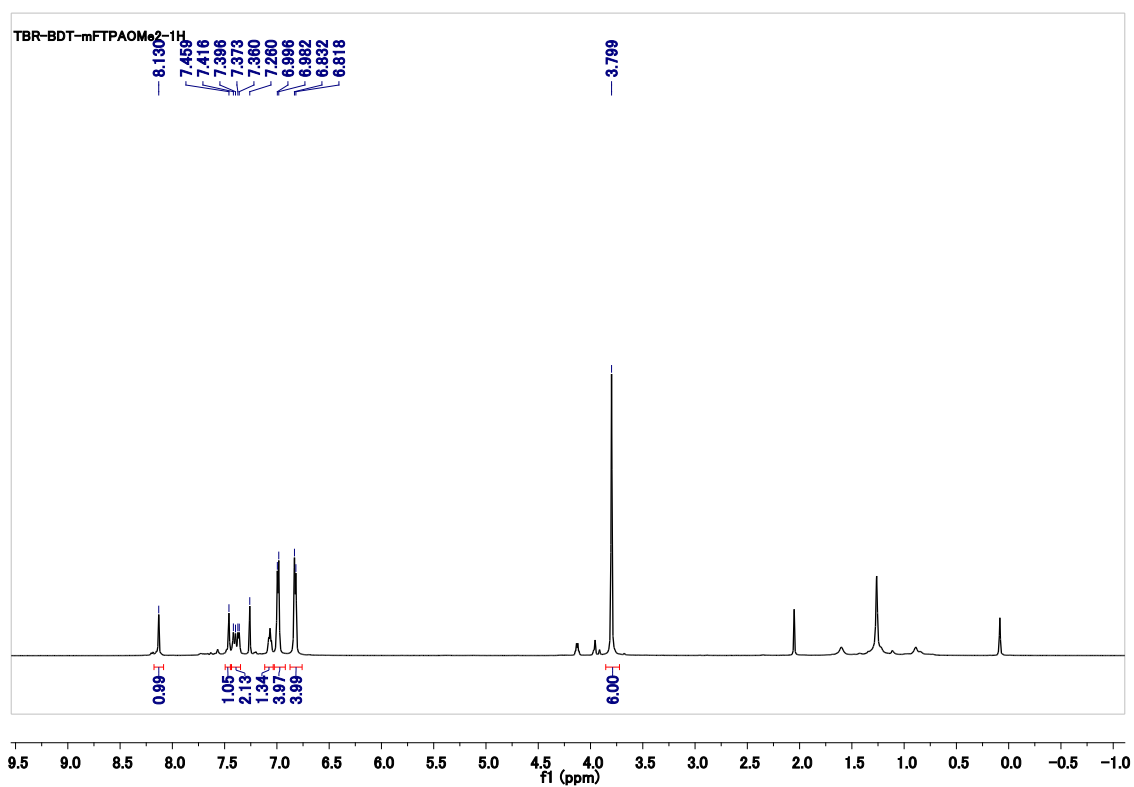

**Fig. S13.**  $^1\text{H}$  NMR spectrum of compound 12 in deuterated chloroform.

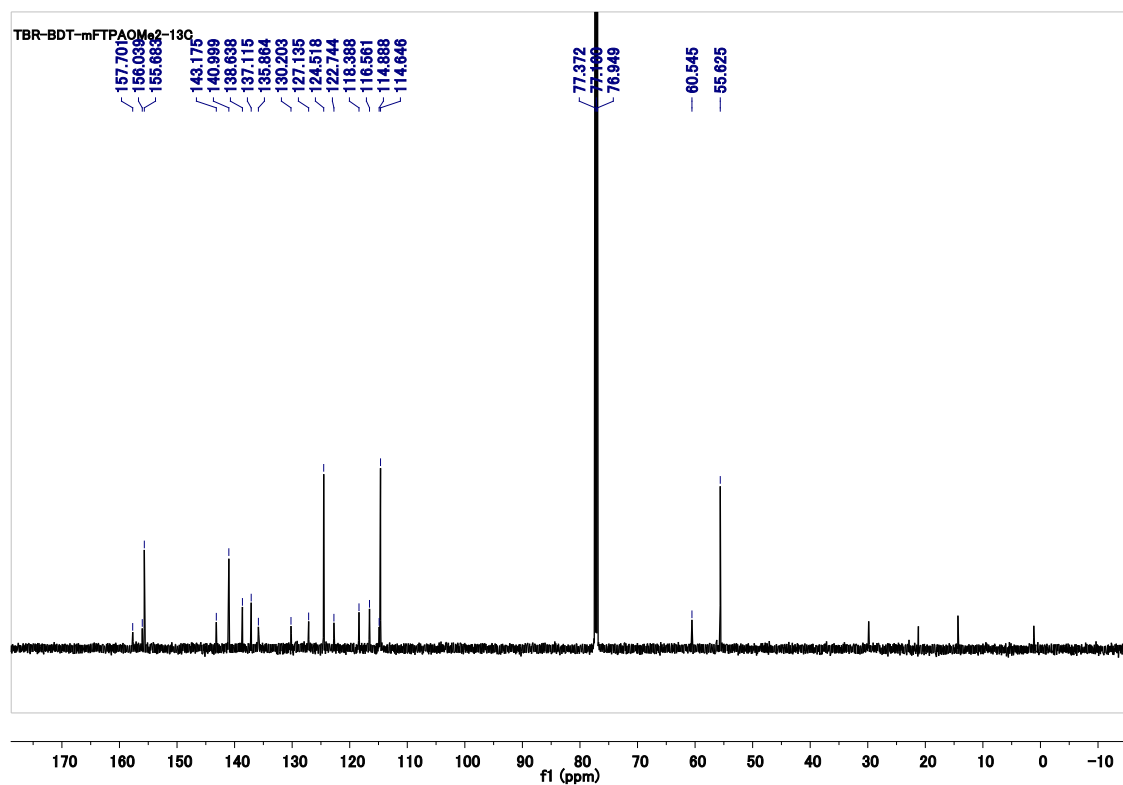

**Fig. S14.**  $^{13}\text{C}$  NMR spectrum of compound 12 in deuterated chloroform.

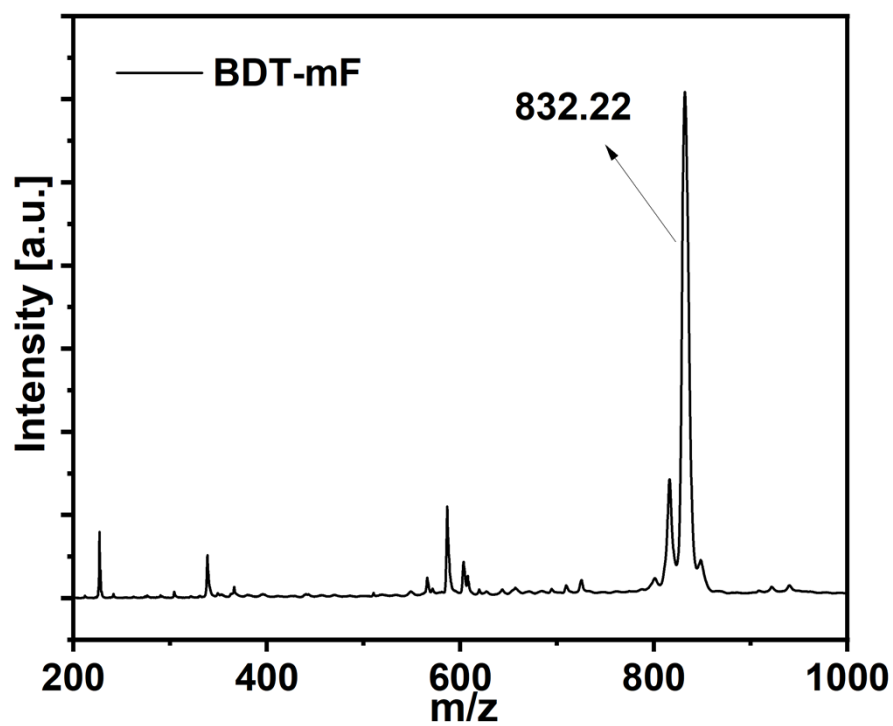

**Fig. S15.** Mass spectrum of compound 12.

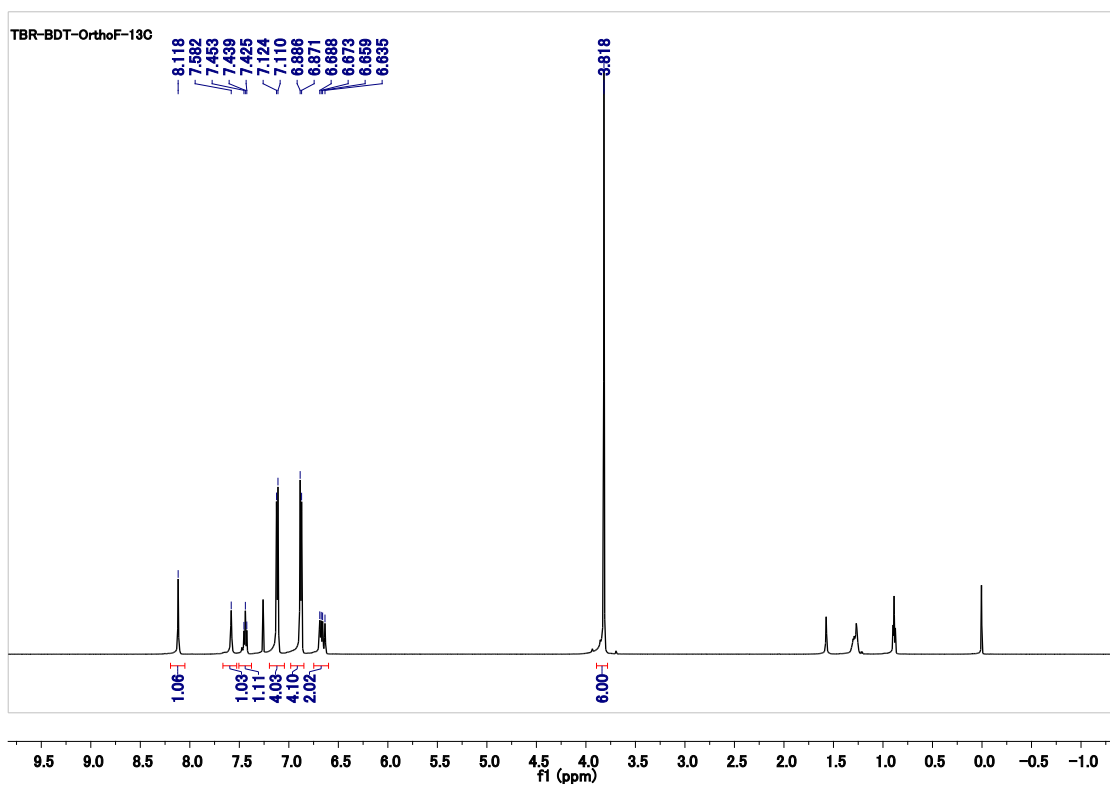

**Fig. S16.**  $^1\text{H}$  NMR spectrum of compound 13 in deuterated chloroform.

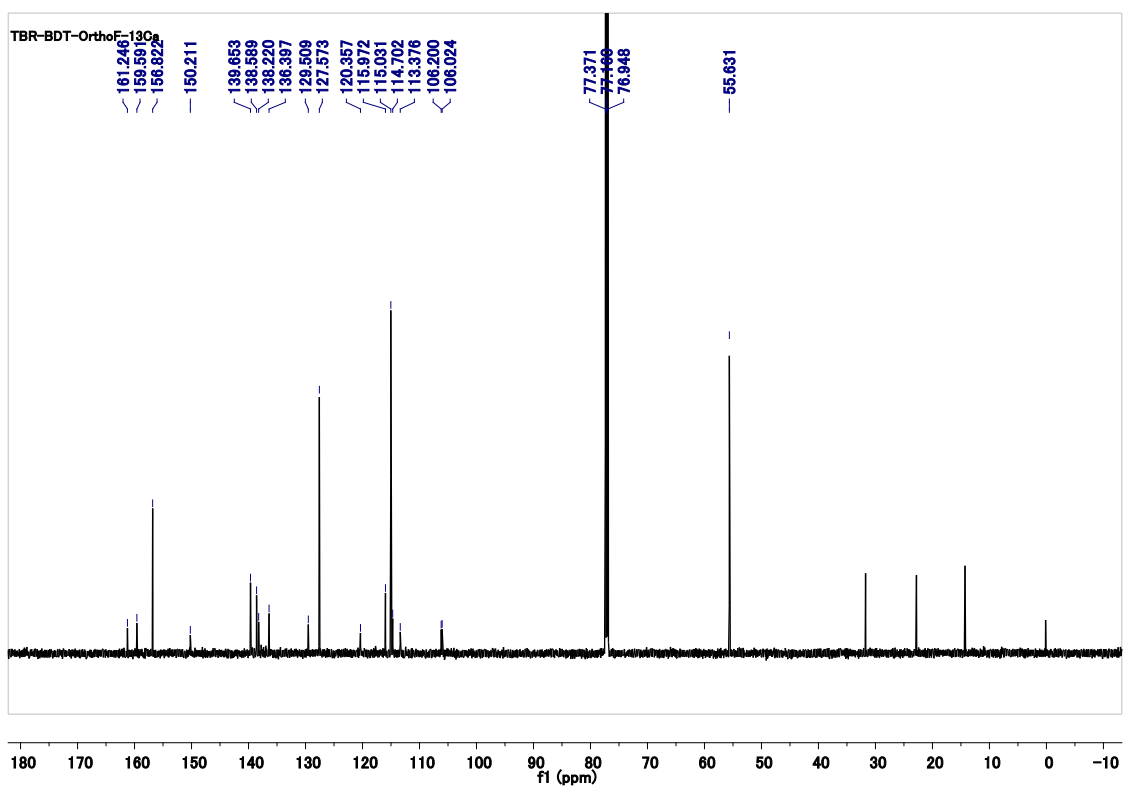

Fig. S17.  $^{13}\text{C}$  NMR spectrum of compound 13 in deuterated chloroform.

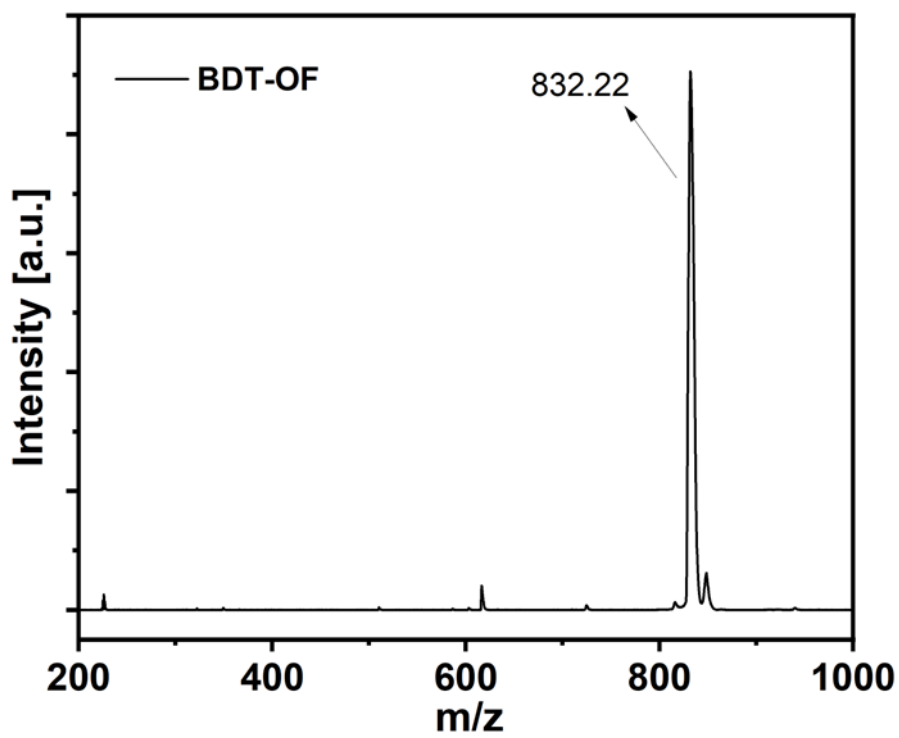

Fig. S18. Mass spectrum of compound 13.

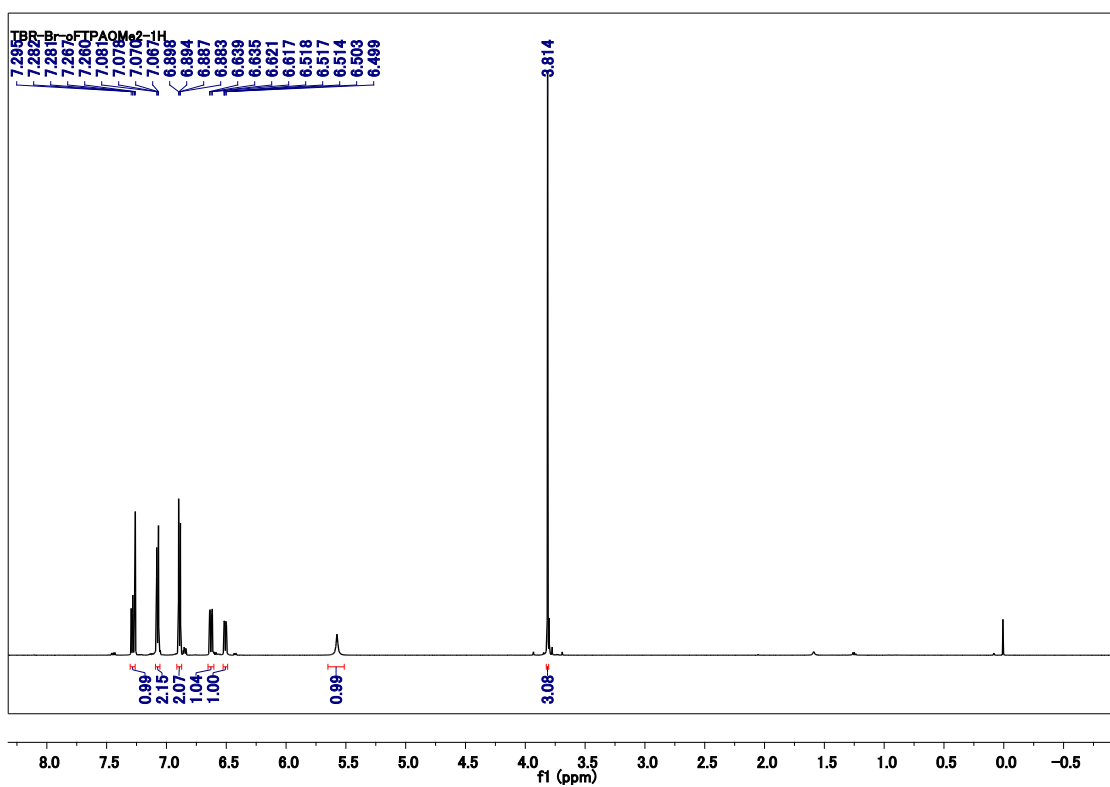

**Fig. S19.**  $^1\text{H}$  NMR spectrum of compound 16 in deuterated chloroform.

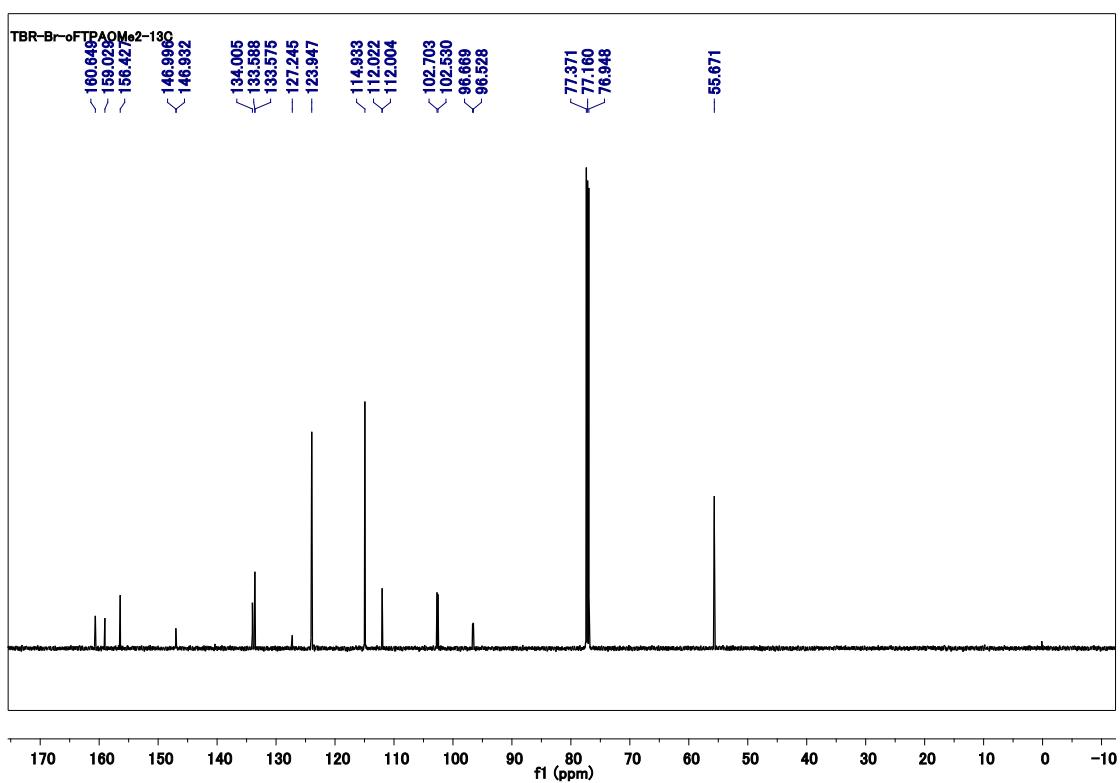

**Fig. S20.**  $^{13}\text{C}$  NMR spectrum of compound 16 in deuterated chloroform.



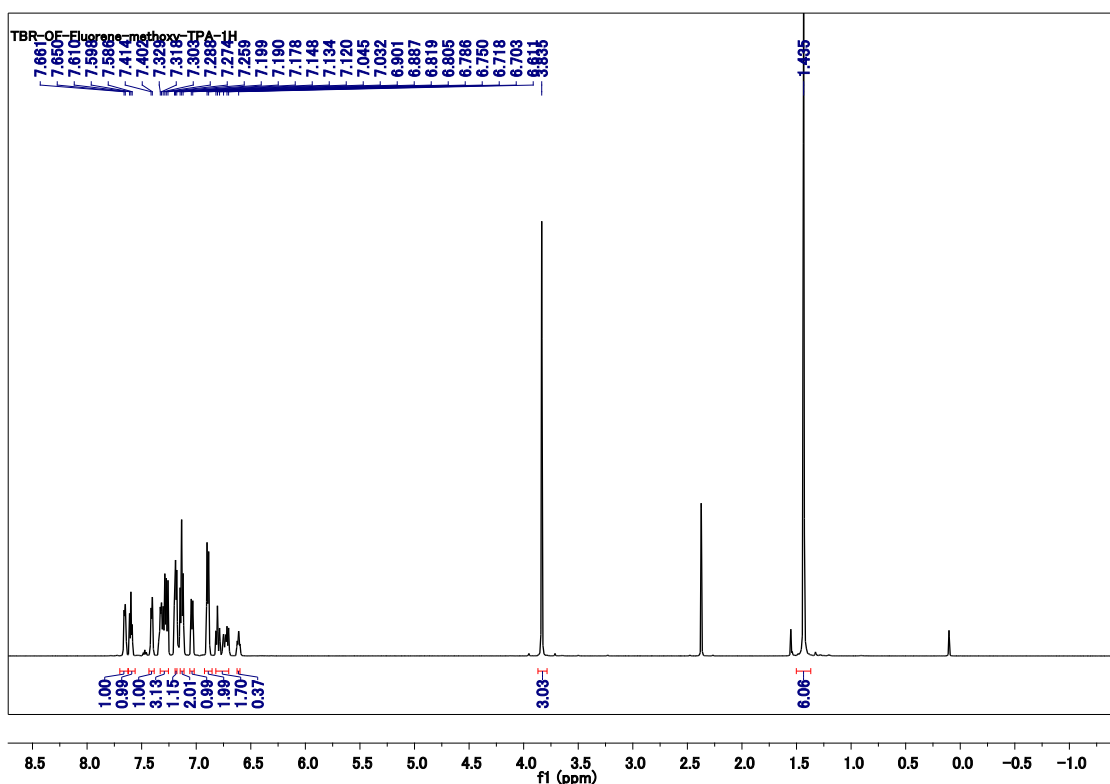

Fig. S21. <sup>1</sup>H NMR spectrum of compound 18 in deuterated chloroform.

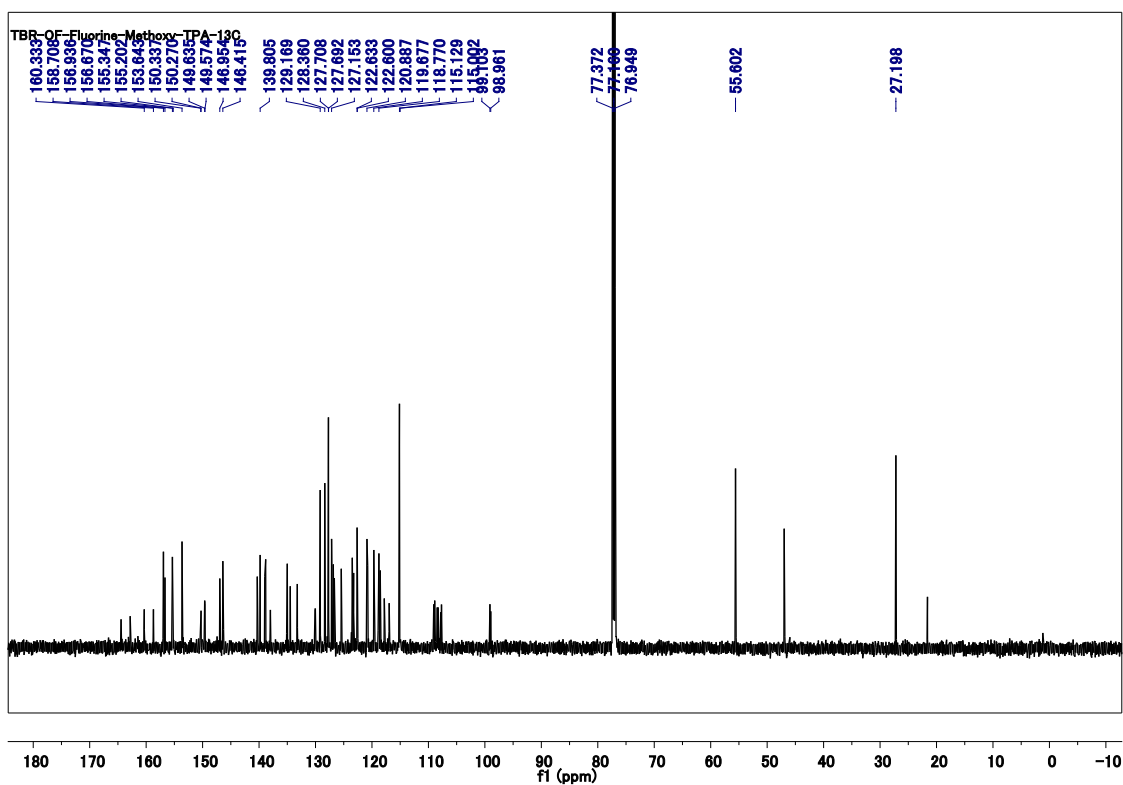

Fig. S22. <sup>13</sup>C NMR spectrum of compound 18 in deuterated chloroform.

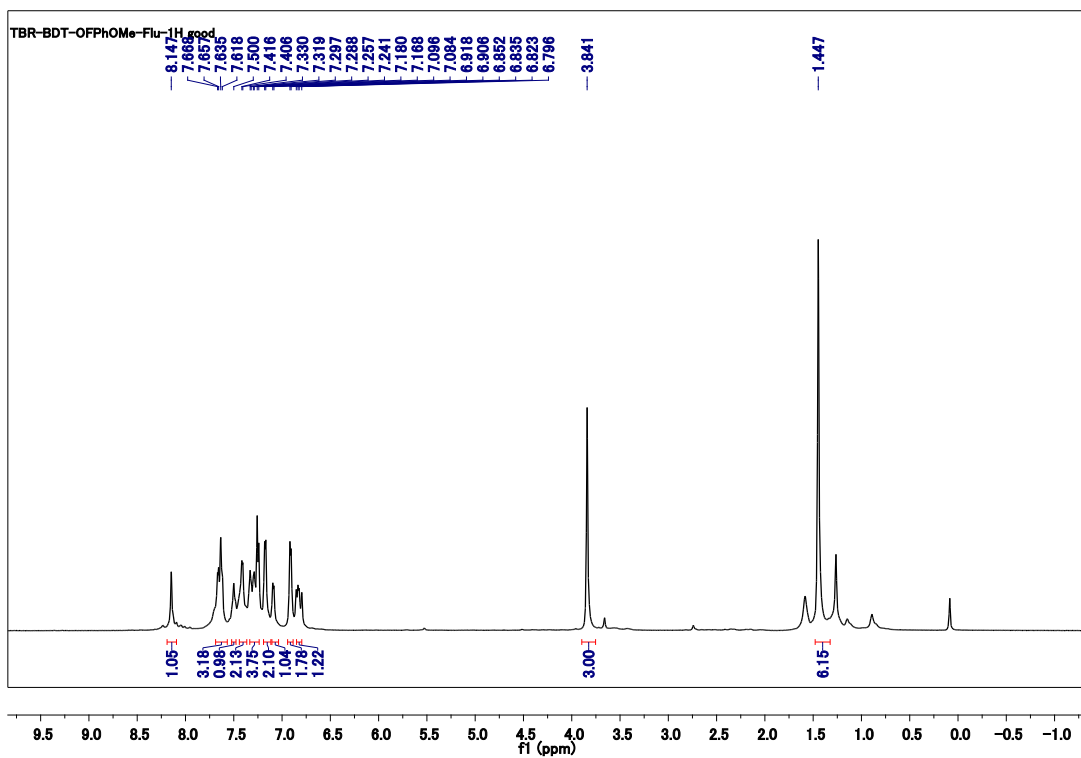

g. S23. <sup>1</sup>H NMR spectrum of compound 19 in deuterated chloroform.

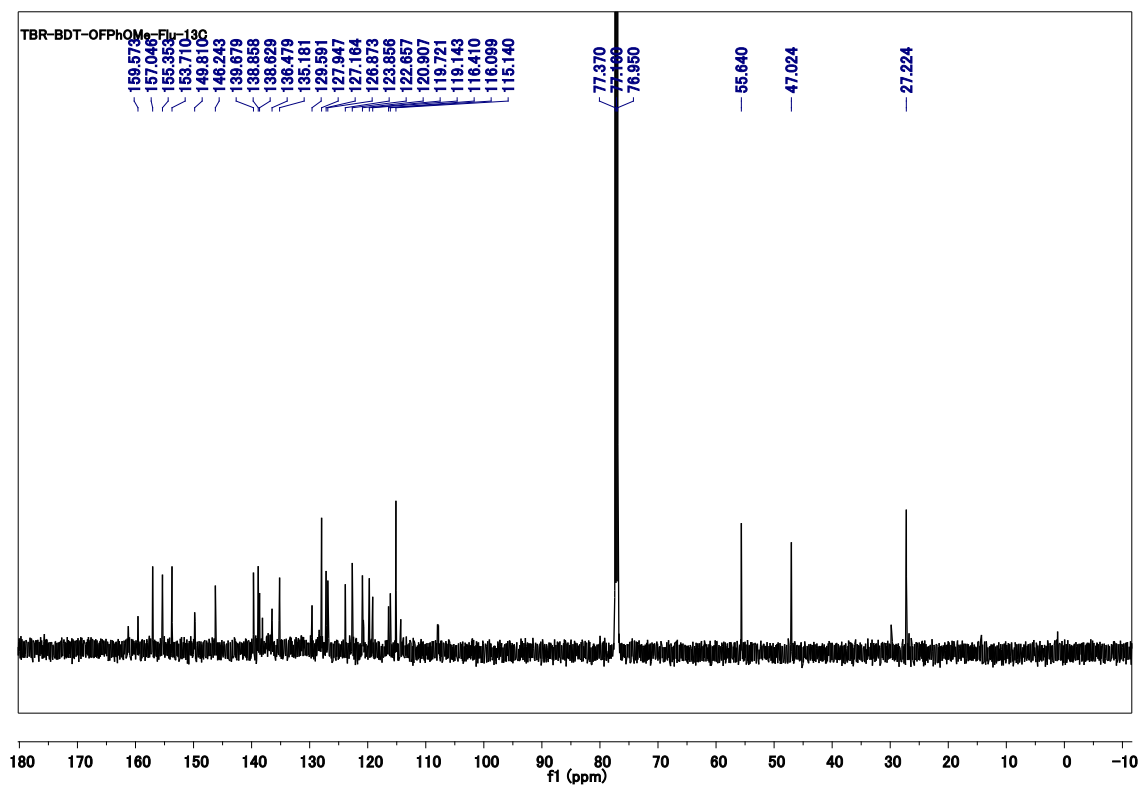

Fig. S24. <sup>13</sup>C NMR spectrum of compound 19 in deuterated chloroform.

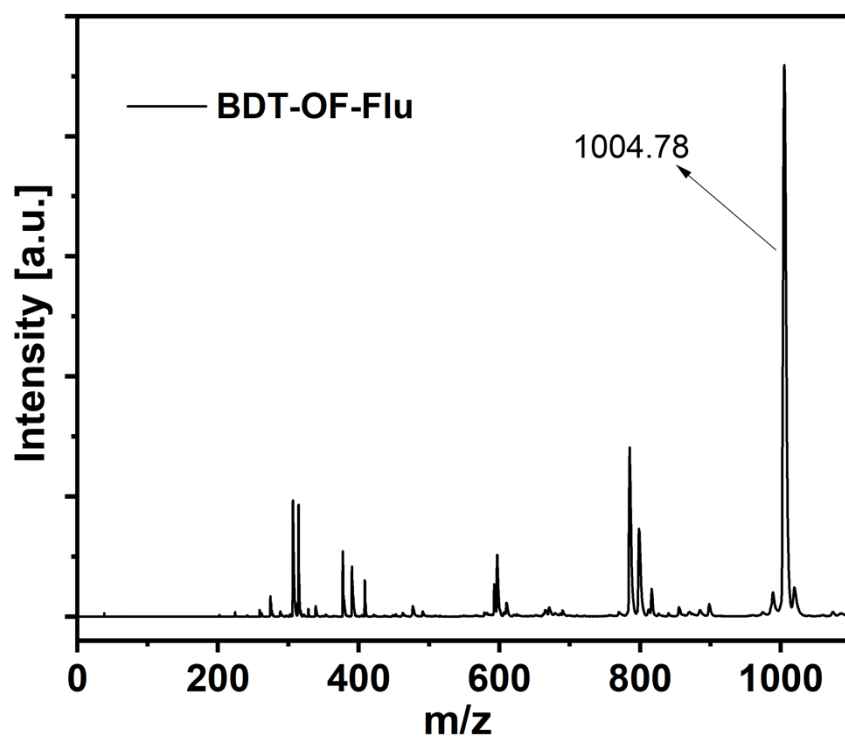

**Fig. S25.** Mass spectrum of compound 19.

## 2. Device Fabrication

### 2.1 Methods and materials

The SnO<sub>2</sub> colloidal solution (15% in H<sub>2</sub>O colloidal dispersion) was purchased from Alfa Aesar. Formamidinium iodide (FAI), methylammonium bromide (MABr), lead iodide (PbI<sub>2</sub>), lead bromide (PbBr<sub>2</sub>), and cesium iodide (CsI) were obtained from Tokyo Chemical Industry. Chlorobenzene (CB), *N,N*-dimethylformamide (DMF), dimethyl sulfoxide (DMSO), acetonitrile,, 4-tert-butylpyridine (4-tBP), lithium bis(trifluoromethylsulfonyl)imide (LiTFSI), and tris(2-(1H-pyrazol-1-yl)-4-tert-butylpyridine)cobalt(III) tri[bis(trifluoromethanesulfonyl)imide] (FK-209) were purchased from Sigma-Aldrich. ITO-coated glass substrates were sourced from Atsugi Micro.

### 2.2 Preparation of precursor solutions:

A perovskite precursor solution was prepared by dissolving 1.10 M FAI, 0.20 M MABr, 1.15 M PbI<sub>2</sub>, and 0.20 M PbBr<sub>2</sub> in an anhydrous DMF/DMSO solvent mixture (4:1 v/v). Additionally, a 0.08 M CsI solution in DMSO was added to the precursor mixture. The resulting solution was stirred at 70 °C for 1 hour and then filtered through a 0.2 µm polytetrafluoroethylene (PTFE) filter prior to use. Solutions of the HTMs were prepared by dissolving 30 mg of HTM in 0.5 mL CB. To this solution, 9 µL of LiTFSI solution (520 mg mL<sup>-1</sup> in acetonitrile), 14.5 µL of FK-209 solution (300 mg mL<sup>-1</sup> in acetonitrile), and 15 µL of 4-tert-butylpyridine (4-tBP) were added. All HTM precursor solutions were filtered through a 0.2 µm PTFE filter before use.

### 2.3 Fabrication of the devices:

Glass substrates with a pre-patterned ITO layer (~150 nm thick, Atsugi Micro) and a sheet resistance of ~10 Ω sq<sup>-1</sup> were sequentially cleaned by ultrasonication in detergent, deionized water, acetone, and isopropanol for 10 minutes each. Prior to use, the cleaned ITO substrates were treated with UV–ozone for 15 minutes. A thin SnO<sub>2</sub> nanoparticle layer (SnO<sub>2</sub> colloid solution diluted 1:3 with deionized water) was spin-coated onto the ITO surface at 3000 rpm for 30 s, followed by annealing at 150 °C for 30 min. After cooling to room temperature, the SnO<sub>2</sub>-coated substrates were subjected to a second UV–ozone treatment for 15 min. The perovskite layer was deposited using a two-step spin-coating process: 1000 rpm for 10 sec and then 6000 rpm for 30 sec. Ten seconds before the end of the spin-coating, 140 µL of CB was dropped onto the spinning substrate. The films were then immediately annealed on a hot plate at 100 °C for 30 min. Next, the synthesized HTM was spin-coated onto the perovskite layer at 4000 rpm for 30 sec.

Finally, an  $\sim 80$  nm Au electrode was thermally evaporated under a base pressure of  $10^{-4}$  Pa with a deposition rate of  $\sim 0.1$  nm s $^{-1}$ .

## 2.4 Solar cell performance measurement

All  $J$ - $V$  curves in this study were recorded using a computer-controlled Keysight B2901A source/measure unit under simulated AM1.5G solar illumination from a Xe lamp-based solar simulator (HAL-320, Asahi Spectra). Measurements were performed in the backward scan direction with a scan rate of 200 mV s $^{-1}$ , while the voltage sweep rate was maintained at 0.05 V s $^{-1}$ . The original PSC area, defined by the overlap of the ITO and Au electrodes, was 0.04 cm $^2$ , whereas the illumination area during  $J$ - $V$  measurements was precisely set to 0.0369 cm $^2$  (determined via optical microscopy) using a black shadow mask. The lamp power was carefully calibrated to 100 mW cm $^{-2}$  using a crystalline Si reference cell with an amorphous Si optical filter (Bunko-Keiki), certified by the National Institute of Advanced Industrial Science and Technology of Japan. IPCE measurements of the PSCs were conducted using a Keysight B2901A source/measure unit coupled with a constant-energy monochromatic light source (PVL-5000, Asahi Spectra). The optical power of the monochromatic light was quantified using a power meter (843-R, Newport) in combination with an optical power detector (818-UV/DB, Newport) to enable accurate IPCE calculation. For electrical characterization, devices with the structure glass substrate/ITO ( $\sim 100$  nm)/chemically doped HTM layer/MoO $_3$  (10 nm)/Al ( $\sim 100$  nm) were fabricated, and their  $J$ - $V$  characteristics were measured in the dark using a computer-controlled Keithley 2400 source unit. The electrical conductivity of the HTM layers was extracted from the slope of the  $J$ - $V$  curves.

**Table S1.** Device results of BDT-NoF-based PSCs.

| Cell | $J_{sc}$<br>(mA cm <sup>-2</sup> ) | $V_{oc}$<br>(V) | FF      | PCE<br>(%) |
|------|------------------------------------|-----------------|---------|------------|
| 1    | 22.5587                            | 0.99627         | 0.63495 | 14.2702    |
| 2    | 22.8553                            | 0.99988         | 0.63475 | 14.5057    |
| 3    | 22.5823                            | 0.98061         | 0.62509 | 13.8423    |
| 4    | 22.704                             | 0.98733         | 0.6055  | 13.5731    |
| 5    | 22.012                             | 0.97985         | 0.63414 | 13.6775    |
| 6    | 22.1407                            | 1.04215         | 0.66436 | 15.3295    |
| 7    | 22.0621                            | 1.07628         | 0.66774 | 15.8555    |
| 8    | 22.9314                            | 1.03047         | 0.68072 | 16.0854    |
| 9    | 23.1341                            | 1.00534         | 0.68871 | 16.0179    |
| 10   | 22.4697                            | 0.98043         | 0.67593 | 14.8907    |
| 11   | 23.4882                            | 0.98548         | 0.68447 | 15.8436    |
| 12   | 23.294                             | 0.9974          | 0.66861 | 15.5342    |

**Table S2.** Device results of BDT-mF-based PSCs.

| Cell | $J_{sc}$<br>(mA cm <sup>-2</sup> ) | $V_{oc}$<br>(V) | FF      | PCE<br>(%) |
|------|------------------------------------|-----------------|---------|------------|
| 1    | 22.506                             | 0.91601         | 0.61504 | 12.6794    |
| 2    | 22.5618                            | 0.89878         | 0.61147 | 12.3994    |
| 3    | 22.1723                            | 0.90358         | 0.60754 | 12.1718    |
| 4    | 22.3587                            | 0.89213         | 0.55316 | 11.0338    |
| 5    | 23.3575                            | 0.91568         | 0.59399 | 12.7044    |
| 6    | 23.4322                            | 0.90285         | 0.59003 | 12.4826    |
| 7    | 23.2183                            | 0.90868         | 0.59483 | 12.5498    |
| 8    | 23.2134                            | 0.89443         | 0.59117 | 12.2744    |
| 9    | 23.4026                            | 0.89939         | 0.59695 | 12.5645    |
| 10   | 23.3727                            | 0.89672         | 0.59898 | 12.554     |
| 11   | 23.5808                            | 0.90986         | 0.61249 | 13.1411    |
| 12   | 23.3881                            | 0.90567         | 0.6053  | 12.8214    |

**Table S3.** Device results of BDT-OF-based PSCs.

| Cell | $J_{sc}$<br>(mA cm <sup>-2</sup> ) | $V_{oc}$<br>(V) | FF      | PCE<br>(%) |
|------|------------------------------------|-----------------|---------|------------|
| 1    | 23.0138                            | 0.99787         | 0.71828 | 16.4953    |
| 2    | 23.2084                            | 1.00257         | 0.70208 | 16.3361    |
| 3    | 23.3338                            | 1.01722         | 0.68789 | 16.3276    |
| 4    | 23.8549                            | 1.00925         | 0.72492 | 17.4528    |
| 5    | 23.3067                            | 1.04009         | 0.69562 | 16.8626    |
| 6    | 23.3589                            | 1.03176         | 0.67993 | 16.3869    |
| 7    | 23.613                             | 1.03512         | 0.68116 | 16.6491    |
| 8    | 23.2663                            | 1.03877         | 0.70022 | 16.9231    |
| 9    | 22.505                             | 1.03193         | 0.74978 | 17.4126    |
| 10   | 22.674                             | 1.0091          | 0.73689 | 16.8602    |
| 11   | 22.7596                            | 1.01792         | 0.7437  | 17.2295    |
| 12   | 23.4288                            | 1.01922         | 0.67704 | 16.1671    |

**Table S4.** Device results of BDT-OF-Flu-based PSCs.

| Cell | $J_{sc}$<br>(mA cm <sup>-2</sup> ) | $V_{oc}$<br>(V) | FF      | PCE<br>(%) |
|------|------------------------------------|-----------------|---------|------------|
| 1    | 24.0334                            | 0.91087         | 0.35046 | 7.6719     |
| 2    | 23.775                             | 0.88028         | 0.40515 | 8.4792     |
| 3    | 24.8157                            | 0.85979         | 0.34846 | 7.4348     |
| 4    | 24.5052                            | 0.85627         | 0.37856 | 7.9434     |
| 5    | 23.6288                            | 0.90548         | 0.43859 | 9.3837     |
| 6    | 23.1194                            | 0.89367         | 0.43618 | 9.012      |
| 7    | 22.9114                            | 0.87204         | 0.45958 | 9.1822     |
| 8    | 23.6186                            | 0.82958         | 0.37606 | 7.3684     |
| 9    | 23.6413                            | 0.86836         | 0.34367 | 7.0553     |
| 10   | 23.6186                            | 0.82958         | 0.37606 | 7.3684     |
| 11   | 24.0341                            | 0.96809         | 0.33279 | 7.743      |

**Table S5.** Device results of spiro-OMeTAD-based PSCs.

| Cell | $J_{sc}$<br>(mA cm <sup>-2</sup> ) | $V_{oc}$<br>(V) | FF      | PCE<br>(%) |
|------|------------------------------------|-----------------|---------|------------|
| 1    | 22.9984                            | 1.1165          | 0.76305 | 19.593     |
| 2    | 23.0868                            | 1.1096          | 0.76126 | 19.502     |
| 3    | 22.8045                            | 1.1115          | 0.76641 | 19.427     |
| 4    | 22.7408                            | 1.1062          | 0.76936 | 19.354     |
| 5    | 22.7348                            | 1.1076          | 0.75291 | 18.960     |
| 6    | 22.9088                            | 1.1031          | 0.74796 | 18.902     |
| 7    | 23.2912                            | 1.0903          | 0.73717 | 18.720     |
| 8    | 23.2317                            | 1.0976          | 0.74941 | 19.110     |
| 9    | 24.0104                            | 1.0894          | 0.72748 | 19.028     |
| 10   | 24.0111                            | 1.0981          | 0.75595 | 19.932     |
| 11   | 23.8404                            | 1.0963          | 0.74773 | 19.544     |
| 12   | 22.7354                            | 1.1329          | 0.74839 | 19.2762    |

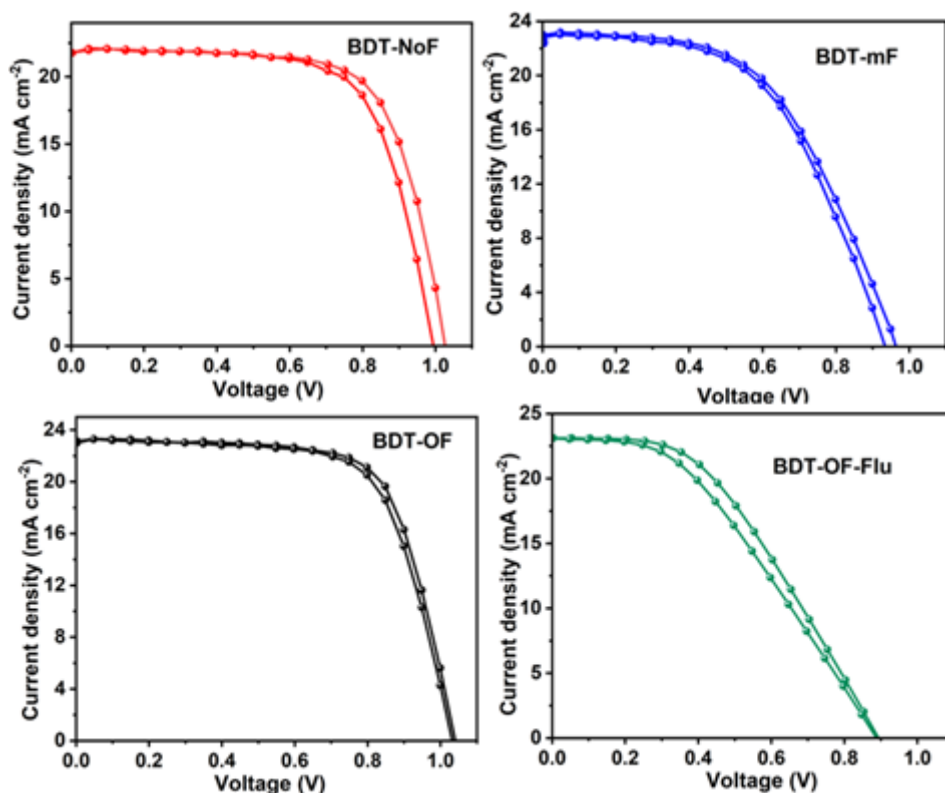

Fig. S26. Forward and reverse  $J$ - $V$  curves of PSCs.

**Table S6.** Device results of PSCs. The hysteresis index (HI) was calculated from the following equation:  $HI = 100 \times (PCE_F - PCE_R) / PCE_F$ .

| HTM        | Device  | $J_{sc}$<br>(mA cm <sup>-2</sup> ) | $V_{oc}$<br>(V) | FF   | PCE<br>(%) | HI   |
|------------|---------|------------------------------------|-----------------|------|------------|------|
| BDT-NoF    | Forward | 22.14                              | 1.04            | 0.66 | 15.32      | 1.95 |
|            | Reverse | 22.10                              | 0.99            | 0.68 | 15.02      |      |
| BDT-mF     | Forward | 23.43                              | 0.90            | 0.59 | 12.48      | 1.76 |
|            | Reverse | 23.30                              | 0.89            | 0.59 | 12.26      |      |
| BDT-OF     | Forward | 23.30                              | 1.04            | 0.69 | 16.86      | 2.8  |
|            | Reverse | 23.34                              | 1.03            | 0.67 | 16.38      |      |
| BDT-OF-Flu | Forward | 23.11                              | 0.89            | 0.43 | 9.01       | 8.9  |
|            | Reverse | 23.09                              | 0.89            | 0.40 | 8.2        |      |



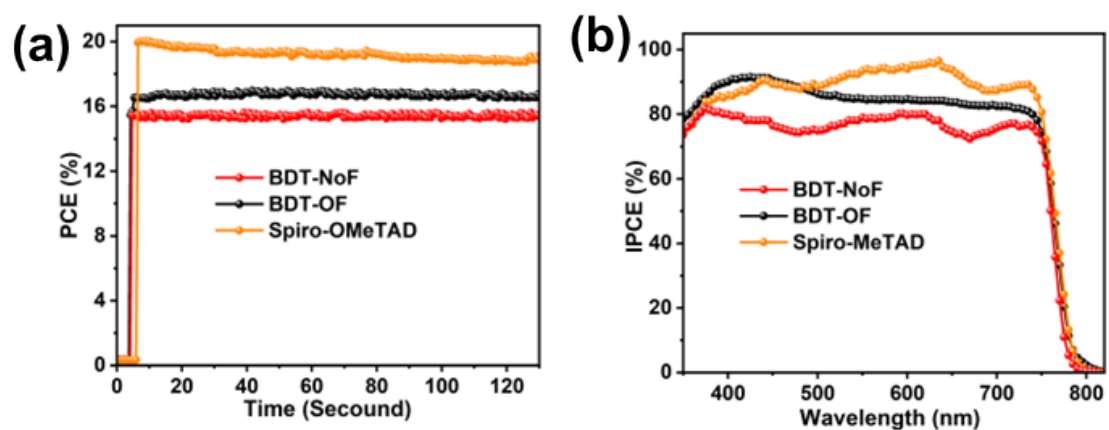

**Fig. S27.** (a) PCE tracking results and (b) IPCE curves of PSCs based on BDT-NoF, BDT-OF, and Spiro-OMeTAD.

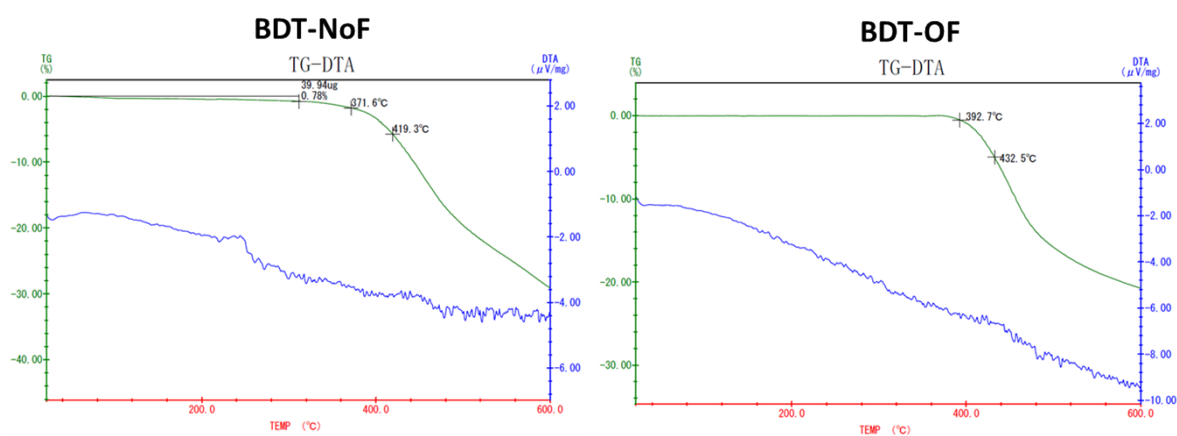

**Fig. S28.** TG-DTA results of BDT-NoF and BDT-OF.

## References

- S1. N. M. Patil, A. A. Kelkar, Raghunath V. Chaudhari. *J. M. Cat. A: Chem.C*, 2004, **223**, 45–50.
- S2. T. B. Raju, C. A. M. Senevirathne, M. Watanabe, Y. Fujita, D. Senba and T. Matsushima, *J. Mater. Chem. C*, 2025, **13**, 15082-15090.
- S3. M. Zhai, N. Shibayama, T. B. Raju, T. Wu, C. Chen, Z. Guo, T. Matsushima, T. Miyasaka and M. Cheng, *Small* **2025**, 2505961.
- S4. H. Zhang, X. Yu, M. Li, Z. Zhang, Z. Song, X. Zong, G. Duan, W. Zhang, C. Chen, W. H. Zhang, Y. Liu and M. Liang, *Angew. Chem. Int. Ed.*, 2023, **62**, e202314270.
